# Supplementary material
Source: HighWire-hosted journal article supplement (https://bmjopenquality.bmj.com/content/6/1/u212969.w5171)
Supplement: inline-supplementary-material-1 [file inline-supplementary-material-1.xlsx]

## Sheet: Run Chart
Run Chart of Data Collected During PDSA Cycles
X-axis (Categories)	Numerator (Number of Patients on Ward Round)	Denominator (Time (mins))	Average Time Per Patient (mins)
2016-05-23	6	57	9.5	Profroma written during round
2016-05-24	6	52	8.66667
2016-05-25	6	56	9.33333
2016-05-26	6	43	7.16667
2016-05-27	6	47	7.83333
2016-05-30	5	44	8.8	Proforma written before round
2016-05-31	5	39	7.8
2016-06-01	5	45	9
2016-06-02	5	41	8.2
2016-06-03	5	42	8.4
2016-06-27	7	47	6.71429	Printed proforma separately
2016-06-28	7	48	6.85714
2016-06-29	7	49	7
2016-06-30	7	45	6.42857
2016-07-01	7	48	6.85714
2016-07-11	7	46	6.57143	Printed Proforma altogether
2016-07-12	7	45	6.42857
2016-07-13	7	47	6.71429
2016-07-14	7	44	6.28571
2016-07-15	7	47	6.71429
Date
